# Supplementary material
Source: PubMed Central journal article supplement (PMC5331736)
Supplement: NIHMS851604-supplement-Suppl_Info.pdf [file NIHMS851604-supplement-Suppl_Info.pdf]

Supplemental information

**Synthesis, characterization and monoamine transporter activity of the new psychoactive substance 3',4'-methylenedioxy-4-methylaminorex (MDMAR).**

Gavin McLaughlin, Noreen Morris, Pierce V. Kavanagh, John D. Power, Brendan Twamley, John O'Brien, Brian Talbot, Geraldine Dowling, Olivia Mahony, Simon D. Brandt, Julian Patrick, Roland P. Archer, John S. Partilla, Michael H. Baumann.

Correspondence to: Gavin McLaughlin, Department of Pharmacology and Therapeutics, School of Medicine, Trinity Centre for Health Sciences, St. James's Hospital, Dublin 8, Ireland. Email: [gavinmclaughlin@research.ait.ie](mailto:gavinmclaughlin@research.ait.ie) or [gmclaug@tcd.ie](mailto:gmclaug@tcd.ie)

**Contents**

1. LC-MS data for the synthesized *cis* and *trans* MDMAR isomers and vendor sample.
2. HR-MS data for the synthesized *cis* and *trans* MDMAR isomers and vendor sample.
3. GC-MS data for vendor sample.
4. NMR data for the synthesized *cis* and *trans* MDMAR isomers and vendor sample.
5. Structure of the cyanamide intermediate, NMR and HR-MS data.
6. X-ray data for the synthesized *cis* MDMAR isomer.

1. LC-MS data for the synthesized *cis* and *trans* MDMA isomers and vendor sample.

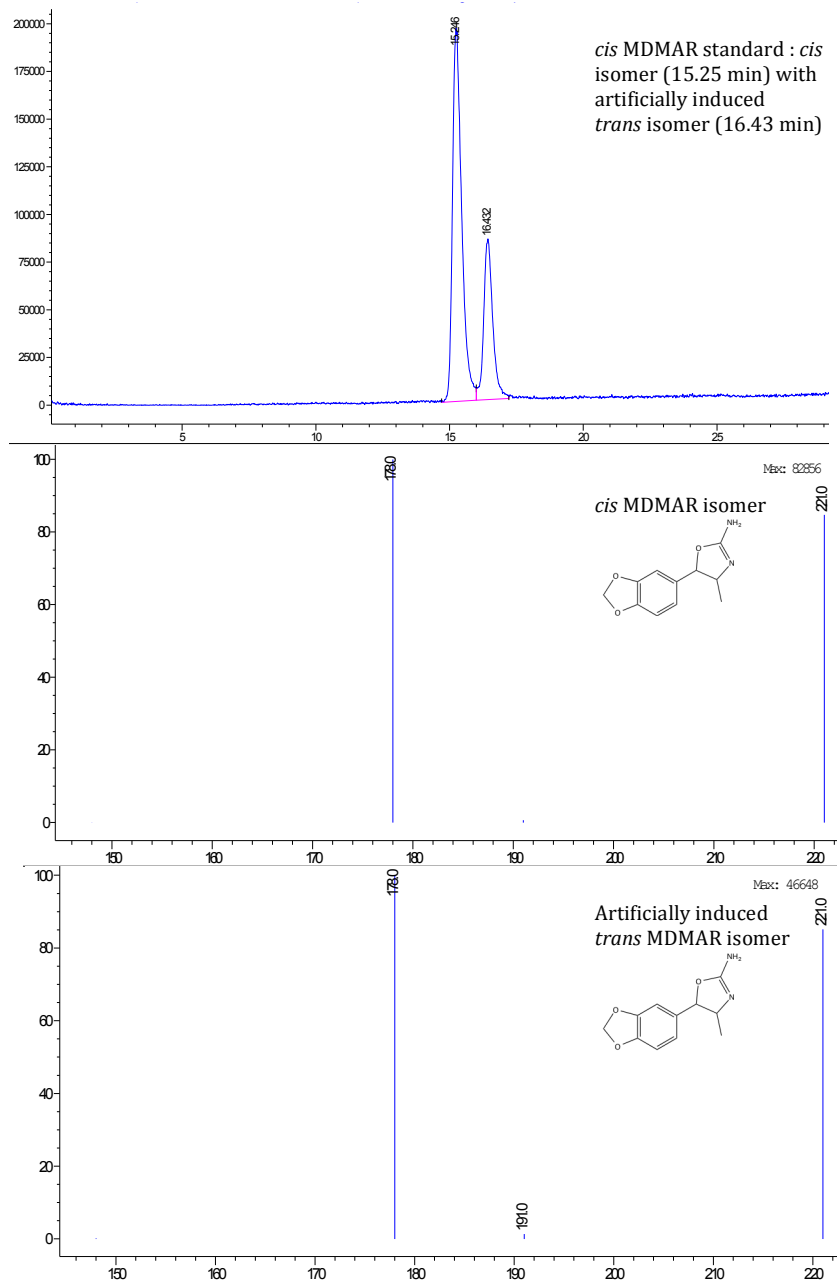

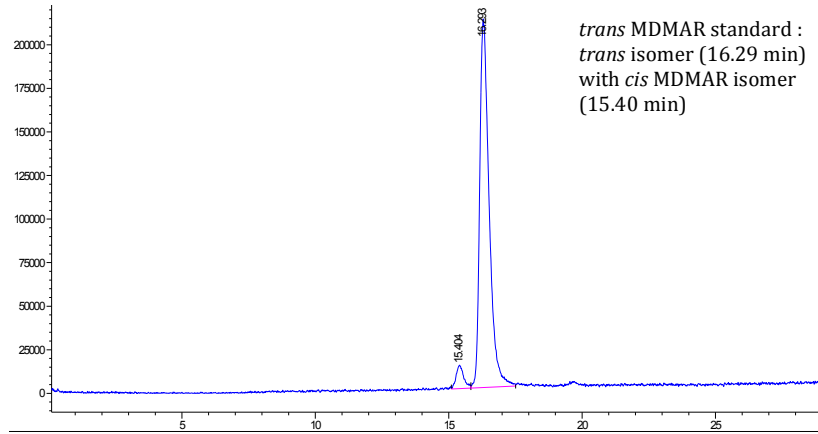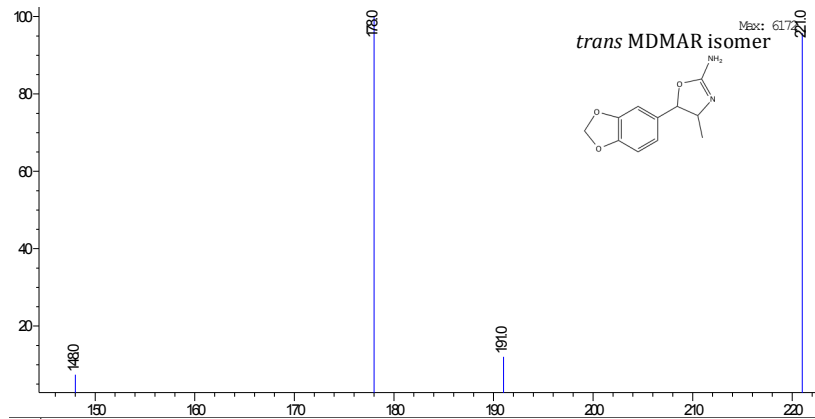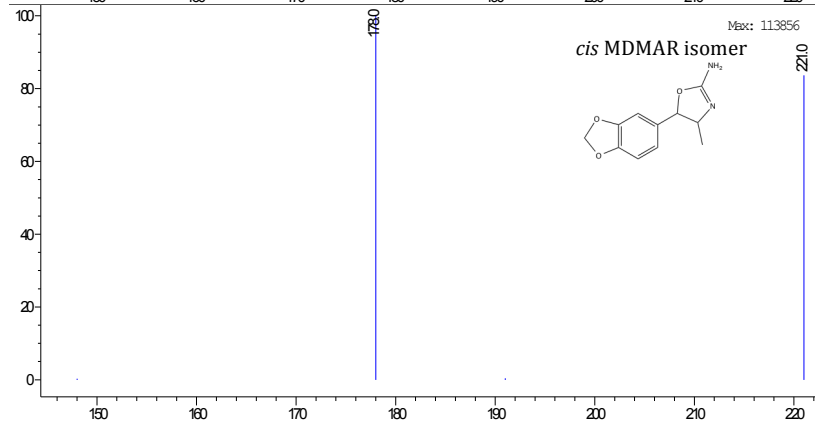

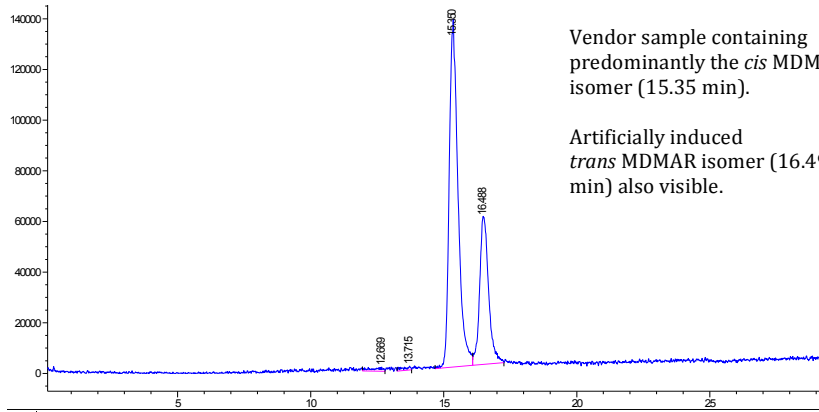

Vendor sample containing predominantly the *cis* MDMA isomer (15.35 min).

Artificially induced *trans* MDMA isomer (16.49 min) also visible.

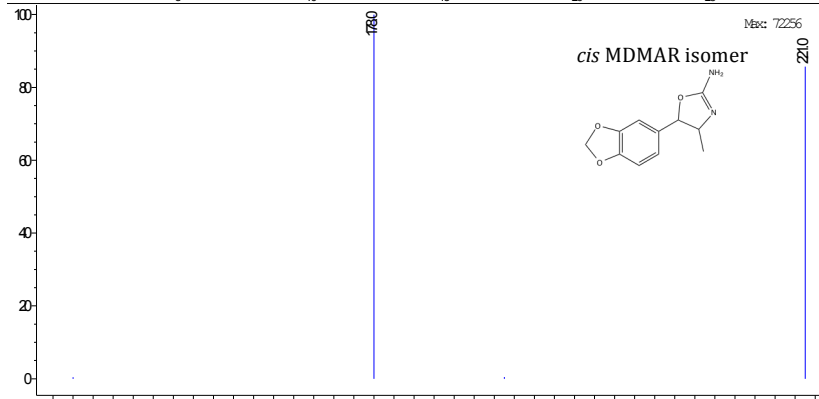

*cis* MDMA isomer

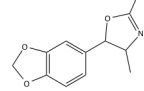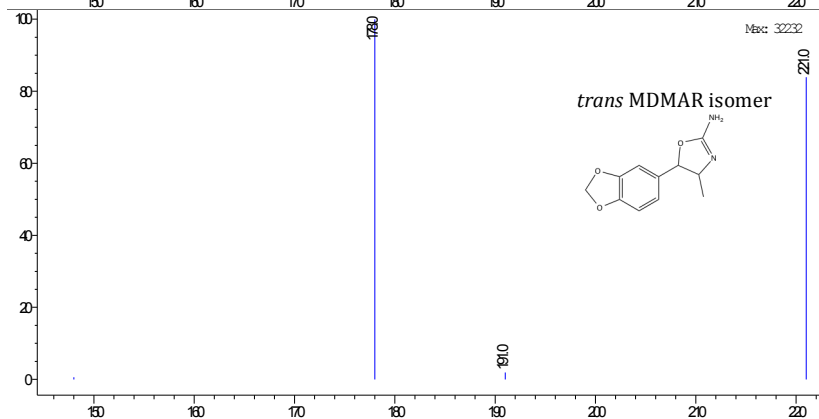

*trans* MDMA isomer

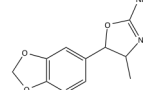

## 2. HR-MS data for the synthesized *cis* and *trans* MDMAR isomers and vendor sample.

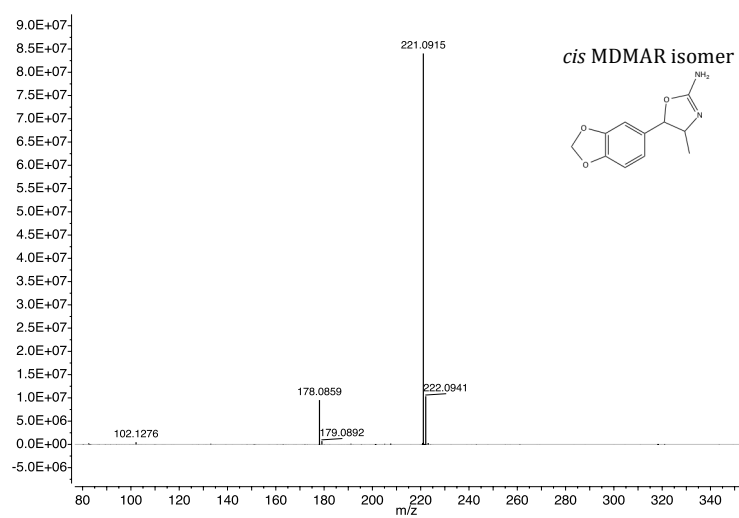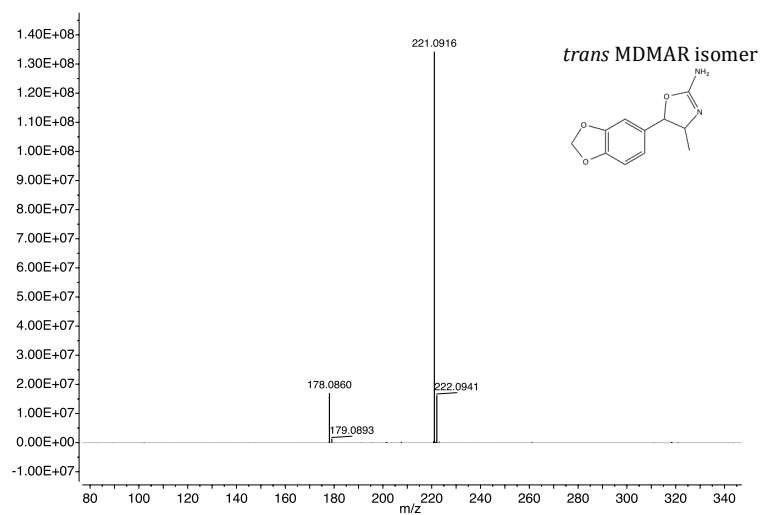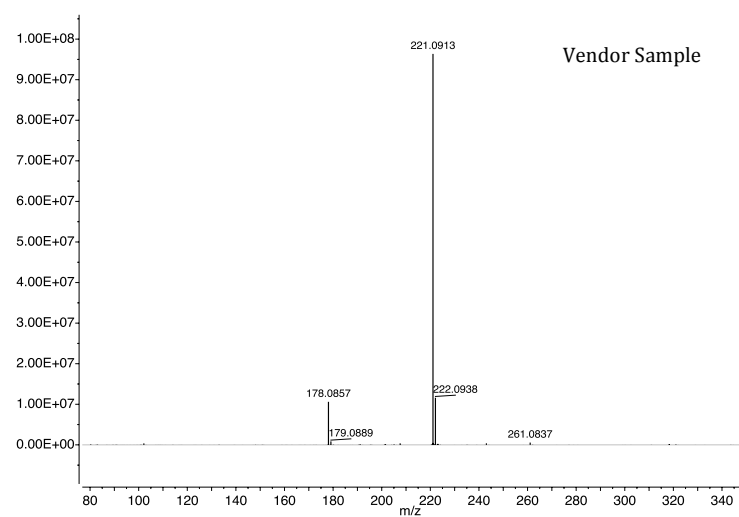

### 3. GC-MS data for vendor sample.

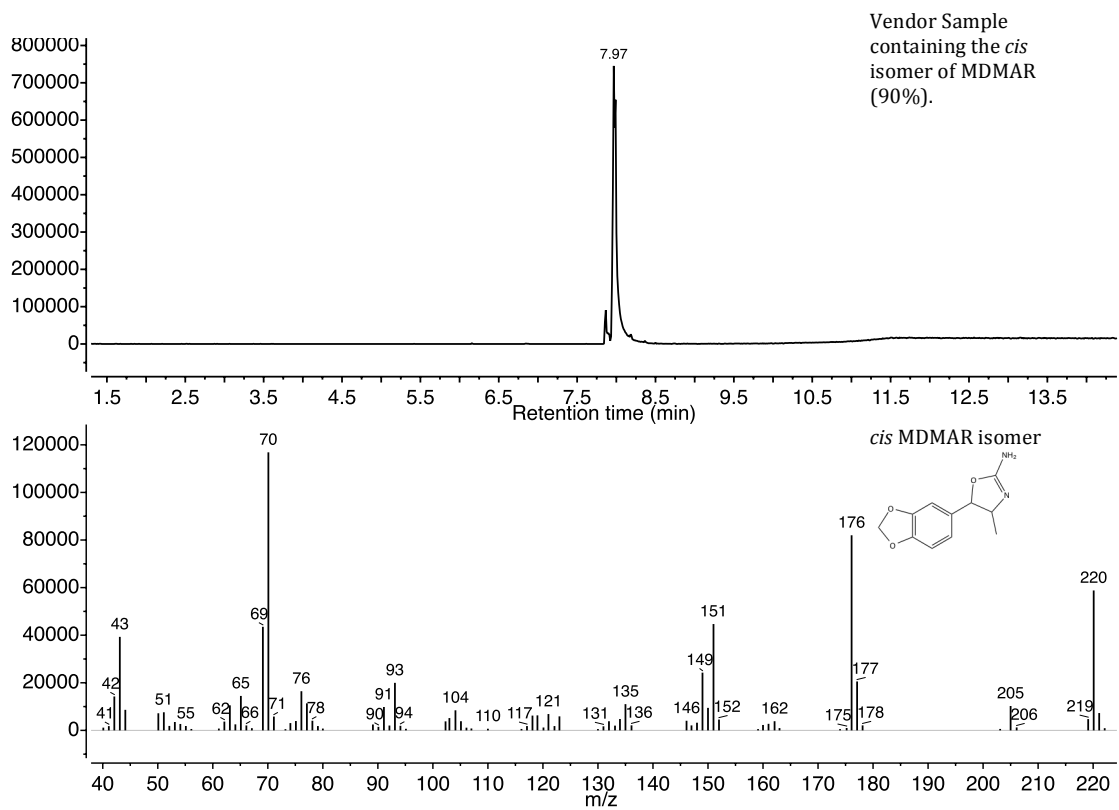

4. NMR data for the synthesized *cis* and *trans* MDMAR isomers and vendor sample.

<sup>1</sup>H NMR of *cis* MDMAR

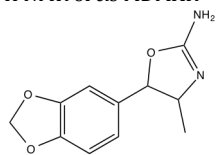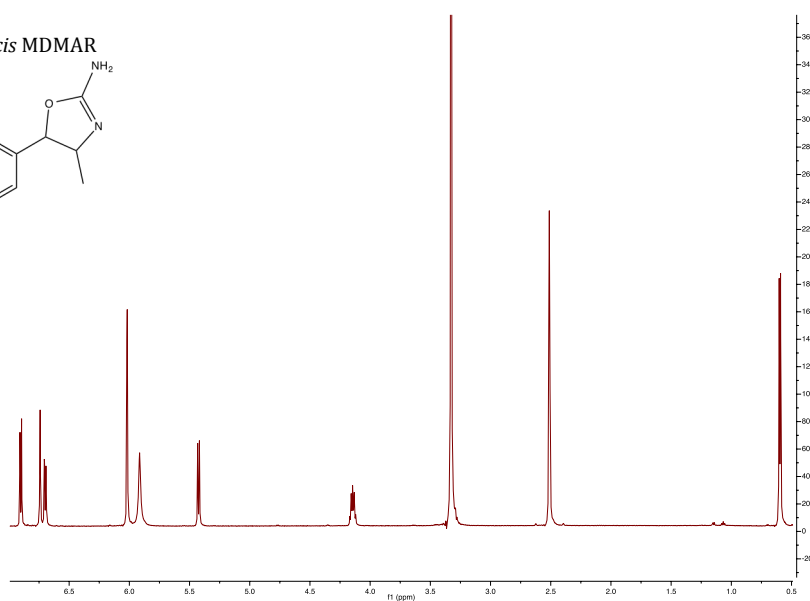

<sup>13</sup>C NMR of *cis* MDMAR

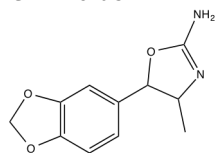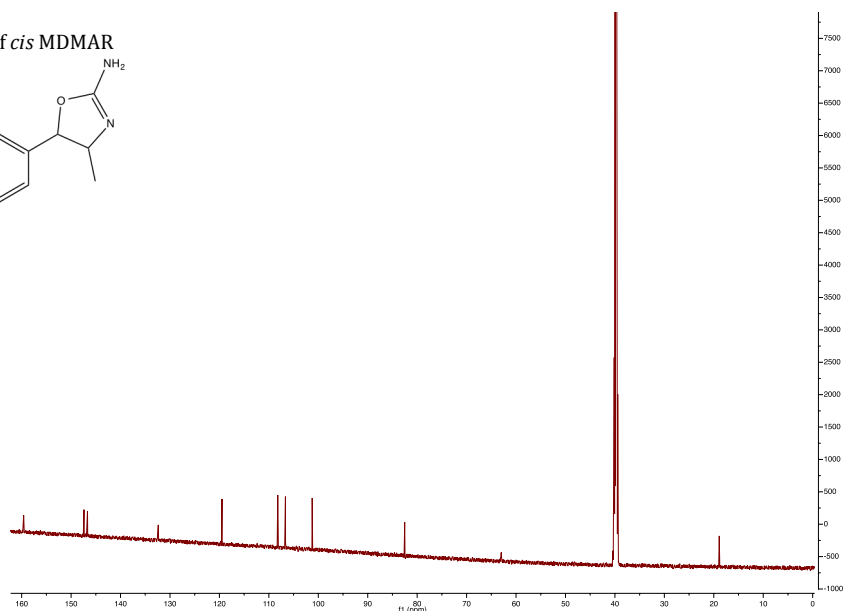

<sup>1</sup>H NMR (DMSO)  $\delta$  6.90 (doublet;  $J = 7.9$  Hz; 1H; Ar-H<sub>6'</sub>), 6.72 (doublet;  $J = 7.9$  Hz; 1H; Ar-H<sub>2'</sub>); 6.69 (doublet;  $J = 1.8$  Hz; 1H; Ar-H<sub>5'</sub>), 5.91 (singlet;  $J = 7.5$  Hz; 2H; CH<sub>2</sub>); 5.43 (doublet;  $J = 8.5$  Hz; 1H; H-5), 4.14 (double quartet;  $J = 8.5, 6.8$  Hz; 1H; H-4), 0.60 (doublet;  $J = 6.8$  Hz; 3H; CH<sub>3</sub>); <sup>13</sup>C NMR (DMSO)  $\delta$  159.59 (C-2); 147.39 (Ar C3'); 146.69 (Ar C4'); 132.36 (Ar C1'); 119.48 (Ar C6'); 108.19 (Ar C5'); 106.64 (Ar C2'); 101.23 (CH<sub>2</sub>); 82.52 (C-5); 63.00 (C-4); 18.90 (CH<sub>3</sub>).

<sup>1</sup>H NMR of *trans* MDMAR

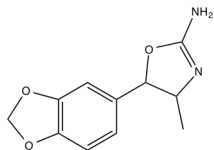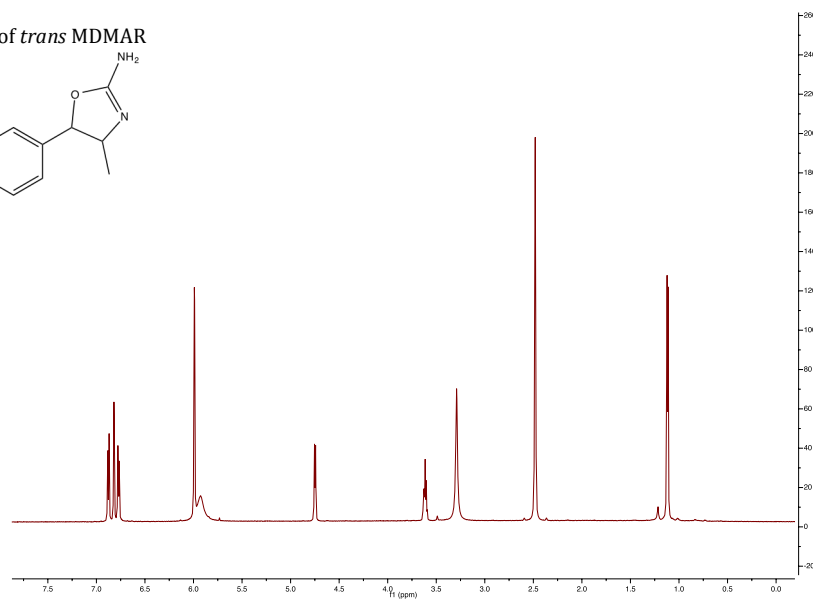

<sup>13</sup>C NMR of *trans* MDMAR

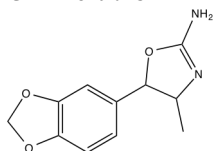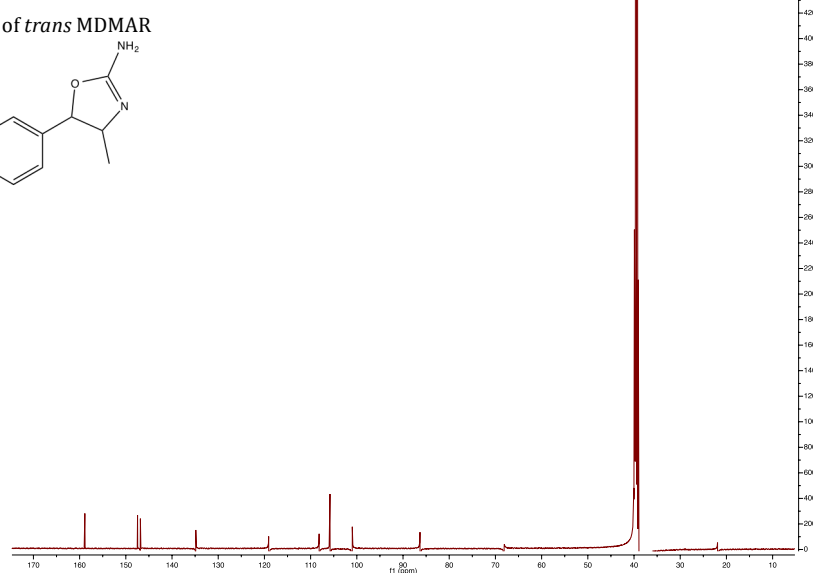

<sup>1</sup>H NMR (DMSO)  $\delta$  6.88 (doublet;  $J = 1.9$  Hz; 1H; Ar-H<sub>6'</sub>); 6.82 (doublet;  $J = 8.0$ Hz; 1H; Ar-H<sub>2'</sub>); 6.77 (doublet;  $J = 1.9$  Hz; 1H; Ar-H<sub>5'</sub>); 5.93 (singlet;  $J = 7.5$  Hz; 2H; CH<sub>2</sub>); 4.75 (doublet;  $J = 6.5$  Hz; 1H; H-5); 4.16 (doublet;  $J = 6.5, 6.4$  Hz; 1H; H-4); 1.12 (doublet;  $J = 6.4$  Hz; 3H; CH<sub>3</sub>); <sup>13</sup>C NMR (DMSO)  $\delta$  159.59 (C-2); 147.39 (Ar C3'); 146.69 (Ar C4'); 132.37 (Ar C1'); 119.47 (Ar C6'); 108.19 (Ar C5'); 106.64 (Ar C2'); 101.23 (CH<sub>2</sub>); 82.52 (C-5); 62.99 (C-4); 18.90 (CH<sub>3</sub>).



<sup>1</sup>H NMR of vendor sample

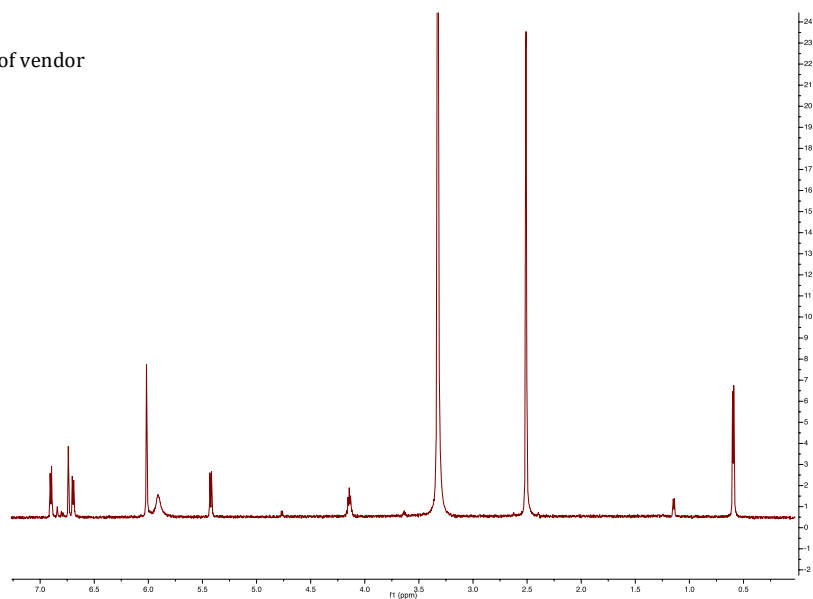

<sup>13</sup>C NMR of vendor sample

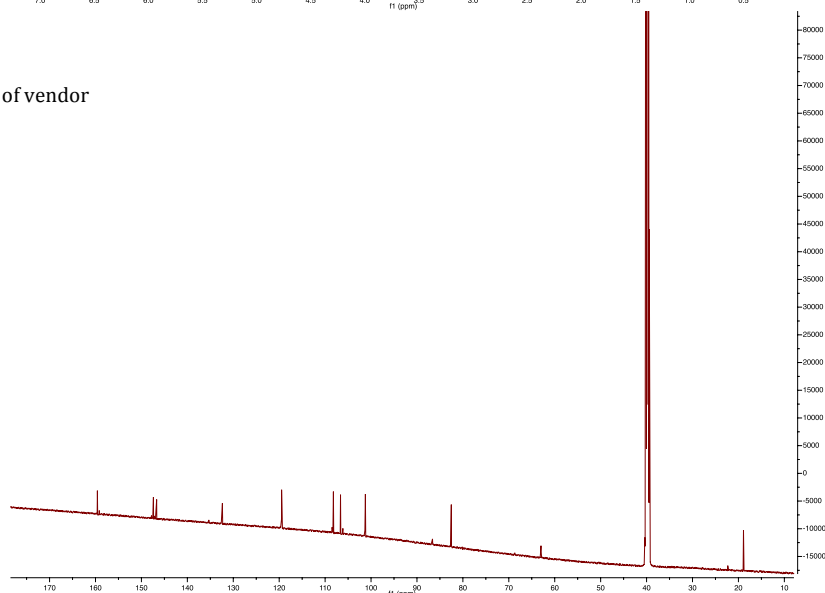

<sup>1</sup>H NMR (DMSO)  $\delta$  6.90 (doublet;  $J = 8.0$  Hz; 1H; Ar-H<sub>6'</sub>), 6.74 (doublet;  $J = 8.0$  Hz; 1H; Ar-H<sub>2'</sub>); 6.70 (doublet;  $J = 1.8$  Hz; 1H; Ar-H<sub>5'</sub>), 5.91 (singlet;  $J = 7.5$  Hz; 2H; CH<sub>2</sub>); 5.42 (doublet;  $J = 8.8$  Hz; 1H; H-5), 4.14 (doublet;  $J = 8.8, 6.6$  Hz; 1H; H-4), 0.60 (doublet;  $J = 6.6$  Hz; 3H; CH<sub>3</sub>); <sup>13</sup>C NMR (DMSO)  $\delta$  159.59 (C-2); 147.39 (Ar C3'); 146.69 (Ar C4'); 132.37 (Ar C1'); 119.47 (Ar C6'); 108.19 (Ar C2'); 101.23 (CH<sub>2</sub>); 82.52 (C-5); 63.00 (C-4); 18.90 (CH<sub>3</sub>).

## 5. Structure of the cyanamide intermediate, NMR and HR-MS data.

The cyanamide intermediate was formed following the literature-based methods for the synthesis of trans-DMAR.

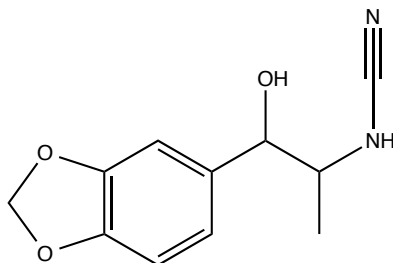

$^1\text{H}$  NMR of cyanamide intermediate

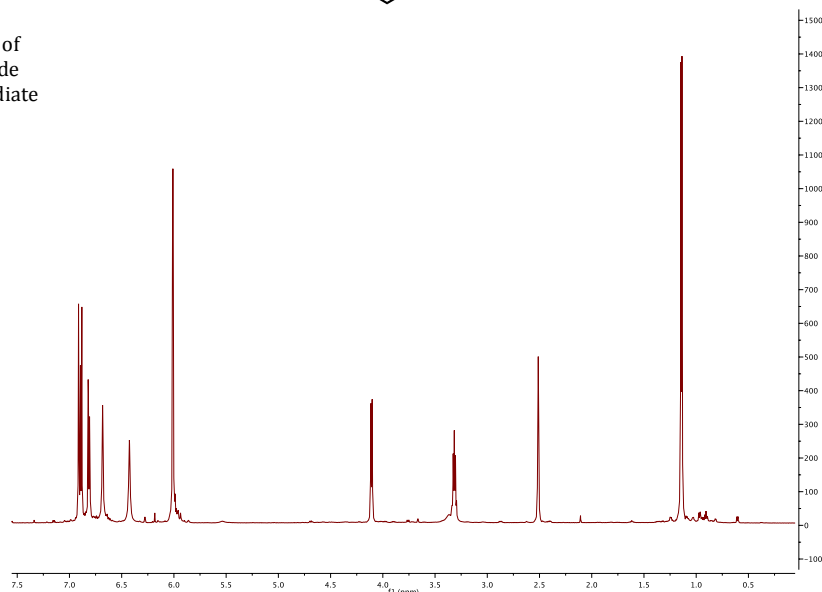

$^{13}\text{C}$  NMR of cyanamide intermediate

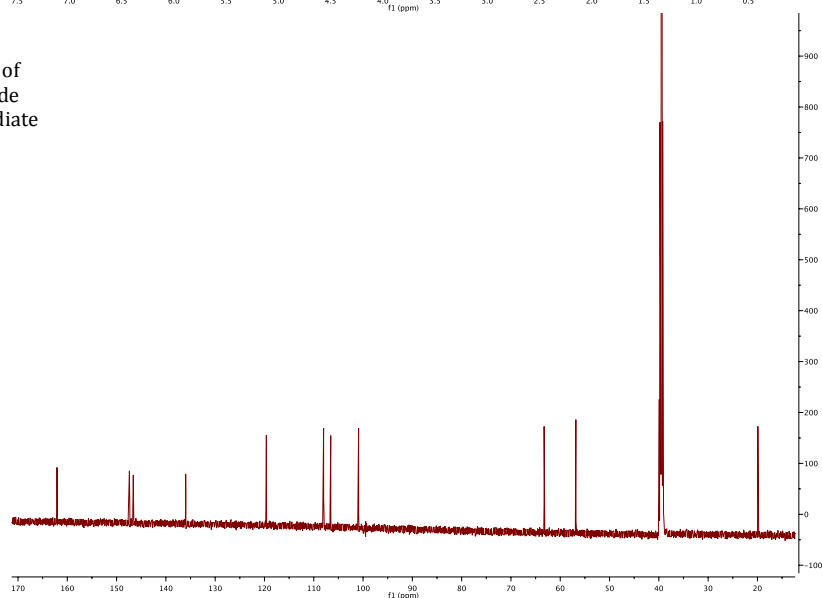

$^1\text{H}$  NMR (DMSO)  $\delta$  6.90 (doublet;  $J = 2.0$  Hz; 1H; Ar-H), 6.81 (doublet;  $J = 8.0$  Hz; 1H; Ar-H), 6.68 (double doublet;  $J = 8.0, 2.0$  Hz; 1H; Ar-H), 5.97 (doublet,  $J = 2.0$  Hz; 2H;  $\text{CH}_2$ ), 4.11 (doublet;  $J = 7.2$  Hz; 1H;  $\text{CH}(\text{OH})$ ), 3.32 (Pentet;  $J = 6.0$  Hz; 1H;  $\text{CH}(\text{CH}_3)$ ); 1.14 (doublet;  $J = 6.0$  Hz; 3H;  $\text{CH}_3$ );  $^{13}\text{C}$  NMR (DMSO)  $\delta$  162.08 (Ar-C); 147.40 (Ar-C); 146.61

(Ar-C); 135.98 (Ar-C); 119.62 (CN); 108.00 (Ar-C); 106.55 (Ar-C); 100.90 (CH<sub>2</sub>); 63.27 (CH(OH)); 56.82 (CH(CH<sub>3</sub>)); 19.91 (CH<sub>3</sub>)

HR-MS data for cyanamide intermediate

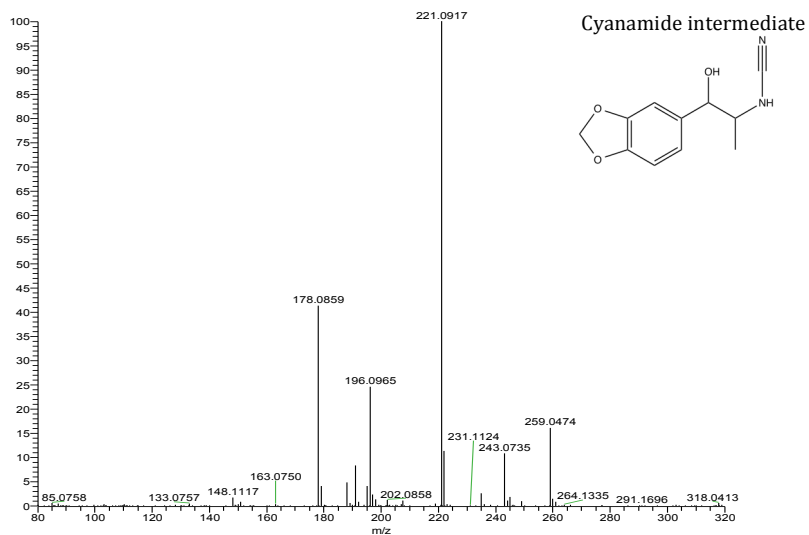

6. X-Ray data for the synthesized *cis* MDMAR isomer (TCD53b).

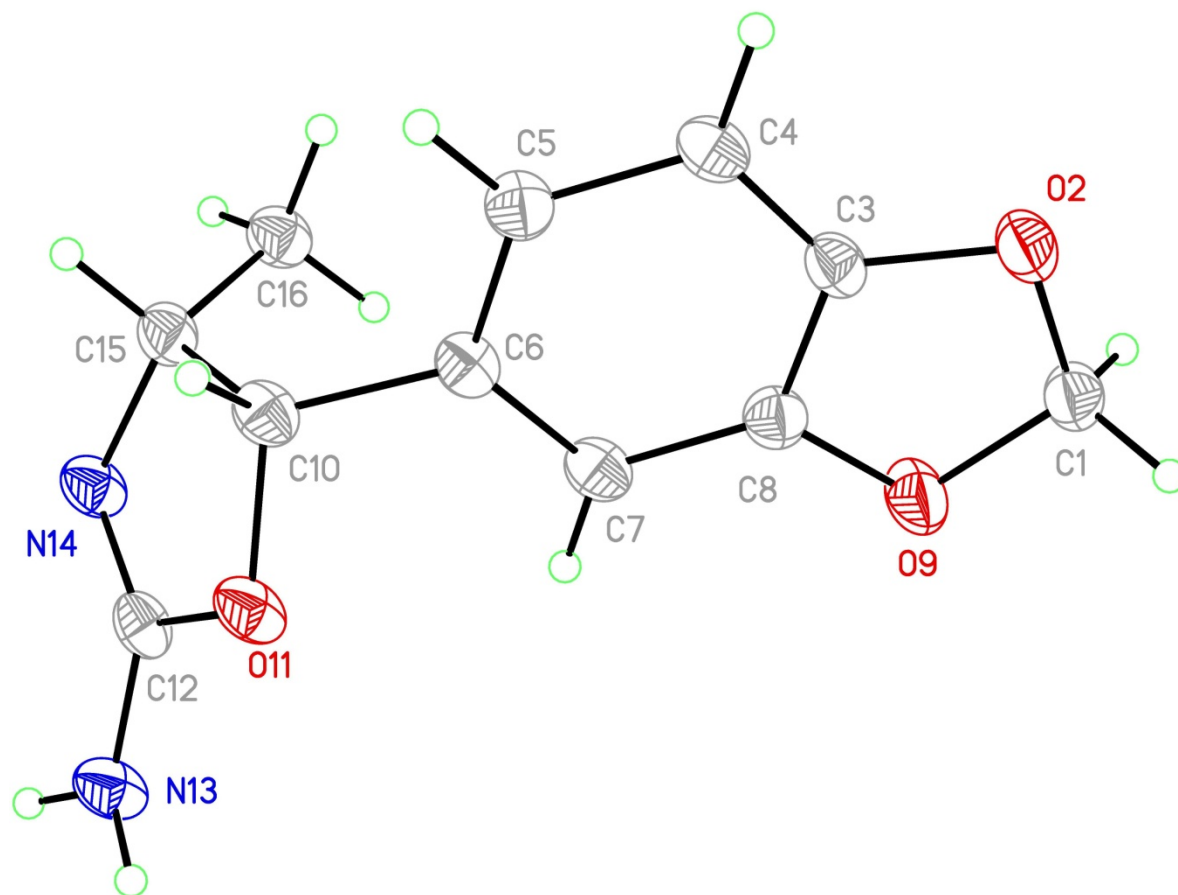

Figure depicting molecular structure of *cis* MDMAR. Displacement ellipsoids shown at 50%.

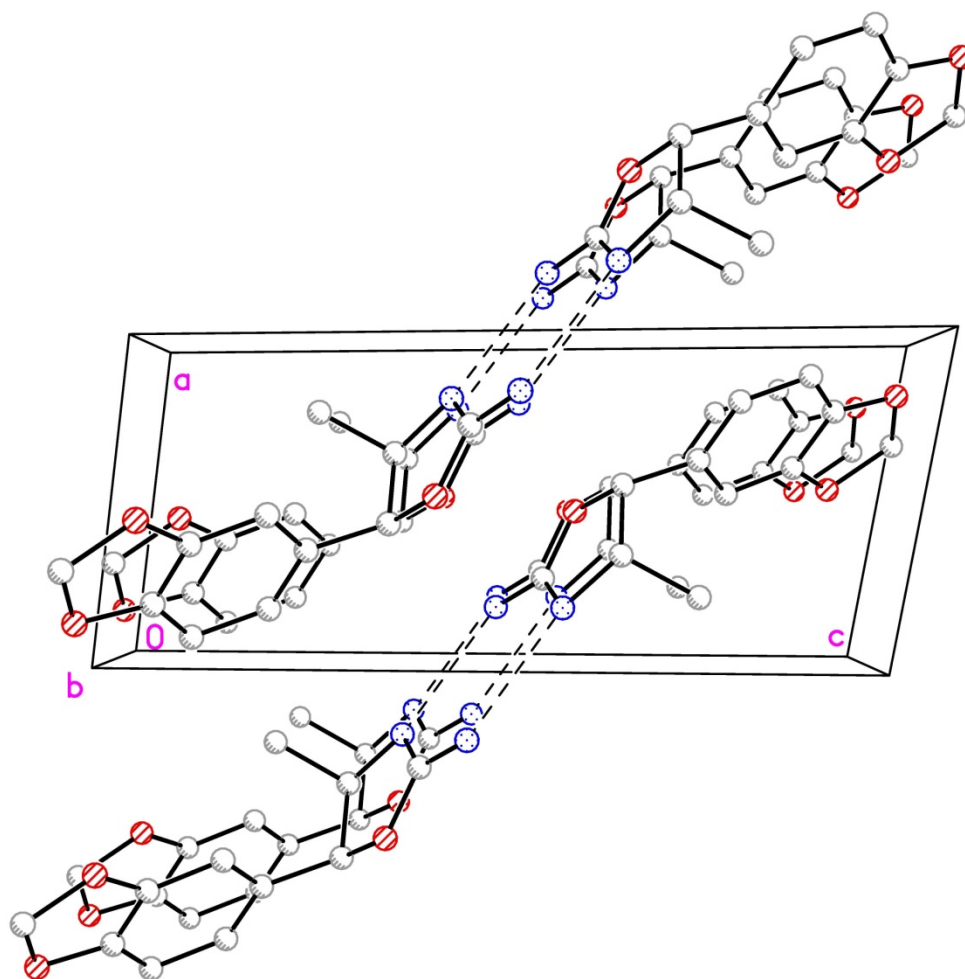

Figure showing packing diagram of *cis* MDMAR viewed down the *b* axis. Strong hydrogen bonding indicated by dashed lines. Hydrogen atoms omitted for clarity.

Table 2. Crystal data and structure refinement for TCD53b.

|                                   |                                             |                              |
|-----------------------------------|---------------------------------------------|------------------------------|
| Identification code               | tcd53b                                      |                              |
| Empirical formula                 | C11 H12 N2 O3                               |                              |
| Formula weight                    | 220.23                                      |                              |
| Temperature                       | 100(2) K                                    |                              |
| Wavelength                        | 1.54178 Å                                   |                              |
| Crystal system                    | Triclinic                                   |                              |
| Space group                       | P $\bar{1}$                                 |                              |
| Unit cell dimensions              | a = 6.1800(2) Å                             | $\alpha = 80.360(2)^\circ$ . |
|                                   | b = 6.4291(3) Å                             | $\beta = 78.857(2)^\circ$ .  |
|                                   | c = 14.0726(6) Å                            | $\gamma = 72.431(2)^\circ$ . |
| Volume                            | 519.43(4) Å <sup>3</sup>                    |                              |
| Z                                 | 2                                           |                              |
| Density (calculated)              | 1.408 Mg/m <sup>3</sup>                     |                              |
| Absorption coefficient            | 0.868 mm <sup>-1</sup>                      |                              |
| F(000)                            | 232                                         |                              |
| Crystal size                      | 0.350 x 0.160 x 0.020 mm <sup>3</sup>       |                              |
| Theta range for data collection   | 3.223 to 69.908°.                           |                              |
| Index ranges                      | -7 ≤ h ≤ 7, -7 ≤ k ≤ 7, -16 ≤ l ≤ 17        |                              |
| Reflections collected             | 7712                                        |                              |
| Independent reflections           | 1932 [R(int) = 0.0363]                      |                              |
| Completeness to theta = 67.679°   | 99.9 %                                      |                              |
| Absorption correction             | Semi-empirical from equivalents             |                              |
| Max. and min. transmission        | 0.7532 and 0.6506                           |                              |
| Refinement method                 | Full-matrix least-squares on F <sup>2</sup> |                              |
| Data / restraints / parameters    | 1932 / 0 / 154                              |                              |
| Goodness-of-fit on F <sup>2</sup> | 1.058                                       |                              |
| Final R indices [I > 2σ(I)]       | R1 = 0.0369, wR2 = 0.0960                   |                              |
| R indices (all data)              | R1 = 0.0415, wR2 = 0.1001                   |                              |
| Extinction coefficient            | n/a                                         |                              |
| Largest diff. peak and hole       | 0.247 and -0.187 e.Å <sup>-3</sup>          |                              |

Table 3. Atomic coordinates ( $\times 10^4$ ) and equivalent isotropic displacement parameters ( $\text{\AA}^2 \times 10^3$ ) for TCD53b.  $U(\text{eq})$  is defined as one third of the trace of the orthogonalized  $U^{ij}$  tensor.

|       | x       | y       | z       | U(eq) |
|-------|---------|---------|---------|-------|
| C(1)  | 3177(2) | 8484(2) | 36(1)   | 26(1) |
| O(2)  | 1680(2) | 7102(2) | 172(1)  | 30(1) |
| C(3)  | 2181(2) | 5666(2) | 996(1)  | 22(1) |
| C(4)  | 1181(2) | 4045(2) | 1435(1) | 24(1) |
| C(5)  | 1964(2) | 2854(2) | 2293(1) | 23(1) |
| C(6)  | 3682(2) | 3286(2) | 2671(1) | 21(1) |
| C(7)  | 4688(2) | 4946(2) | 2203(1) | 24(1) |
| C(8)  | 3887(2) | 6102(2) | 1370(1) | 24(1) |
| O(9)  | 4557(2) | 7816(2) | 798(1)  | 37(1) |
| C(10) | 4434(2) | 1937(2) | 3596(1) | 23(1) |
| O(11) | 5219(2) | 3261(2) | 4128(1) | 26(1) |
| C(12) | 7247(2) | 1977(2) | 4407(1) | 22(1) |
| N(13) | 8159(2) | 2931(2) | 4947(1) | 28(1) |
| N(14) | 8065(2) | 75(2)   | 4118(1) | 25(1) |
| C(15) | 6490(2) | -192(2) | 3512(1) | 24(1) |
| C(16) | 7713(2) | -609(2) | 2489(1) | 26(1) |

Table 4. Bond lengths [ $\text{\AA}$ ] and angles [ $^\circ$ ] for TCD53b.

|                 |            |                     |            |
|-----------------|------------|---------------------|------------|
| C(1)-O(9)       | 1.4287(16) | H(1A)-C(1)-H(1B)    | 108.4      |
| C(1)-O(2)       | 1.4329(17) | C(3)-O(2)-C(1)      | 105.64(10) |
| C(1)-H(1A)      | 0.9900     | C(4)-C(3)-O(2)      | 127.95(12) |
| C(1)-H(1B)      | 0.9900     | C(4)-C(3)-C(8)      | 122.06(13) |
| O(2)-C(3)       | 1.3794(16) | O(2)-C(3)-C(8)      | 109.97(12) |
| C(3)-C(4)       | 1.369(2)   | C(3)-C(4)-C(5)      | 116.51(12) |
| C(3)-C(8)       | 1.3809(19) | C(3)-C(4)-H(4)      | 121.7      |
| C(4)-C(5)       | 1.4048(19) | C(5)-C(4)-H(4)      | 121.7      |
| C(4)-H(4)       | 0.9500     | C(6)-C(5)-C(4)      | 121.63(13) |
| C(5)-C(6)       | 1.3908(18) | C(6)-C(5)-H(5)      | 119.2      |
| C(5)-H(5)       | 0.9500     | C(4)-C(5)-H(5)      | 119.2      |
| C(6)-C(7)       | 1.4021(19) | C(5)-C(6)-C(7)      | 120.62(12) |
| C(6)-C(10)      | 1.5077(18) | C(5)-C(6)-C(10)     | 118.60(12) |
| C(7)-C(8)       | 1.3725(19) | C(7)-C(6)-C(10)     | 120.77(12) |
| C(7)-H(7)       | 0.9500     | C(8)-C(7)-C(6)      | 116.83(12) |
| C(8)-O(9)       | 1.3723(17) | C(8)-C(7)-H(7)      | 121.6      |
| C(10)-O(11)     | 1.4564(16) | C(6)-C(7)-H(7)      | 121.6      |
| C(10)-C(15)     | 1.5645(18) | O(9)-C(8)-C(7)      | 127.72(12) |
| C(10)-H(10)     | 1.0000     | O(9)-C(8)-C(3)      | 109.93(12) |
| O(11)-C(12)     | 1.3653(15) | C(7)-C(8)-C(3)      | 122.34(13) |
| C(12)-N(14)     | 1.2765(18) | C(8)-O(9)-C(1)      | 106.12(10) |
| C(12)-N(13)     | 1.3422(18) | O(11)-C(10)-C(6)    | 109.11(11) |
| N(13)-H(13A)    | 0.91(2)    | O(11)-C(10)-C(15)   | 103.36(10) |
| N(13)-H(13B)    | 0.89(2)    | C(6)-C(10)-C(15)    | 118.54(11) |
| N(14)-C(15)     | 1.4746(16) | O(11)-C(10)-H(10)   | 108.5      |
| C(15)-C(16)     | 1.5179(19) | C(6)-C(10)-H(10)    | 108.5      |
| C(15)-H(15)     | 1.0000     | C(15)-C(10)-H(10)   | 108.5      |
| C(16)-H(16A)    | 0.9800     | C(12)-O(11)-C(10)   | 106.69(10) |
| C(16)-H(16B)    | 0.9800     | N(14)-C(12)-N(13)   | 128.01(12) |
| C(16)-H(16C)    | 0.9800     | N(14)-C(12)-O(11)   | 117.72(12) |
|                 |            | N(13)-C(12)-O(11)   | 114.25(12) |
| O(9)-C(1)-O(2)  | 108.33(10) | C(12)-N(13)-H(13A)  | 117.1(11)  |
| O(9)-C(1)-H(1A) | 110.0      | C(12)-N(13)-H(13B)  | 118.1(12)  |
| O(2)-C(1)-H(1A) | 110.0      | H(13A)-N(13)-H(13B) | 117.8(16)  |
| O(9)-C(1)-H(1B) | 110.0      | C(12)-N(14)-C(15)   | 107.83(11) |
| O(2)-C(1)-H(1B) | 110.0      | N(14)-C(15)-C(16)   | 111.09(11) |



|                    |            |                     |       |
|--------------------|------------|---------------------|-------|
| N(14)-C(15)-C(10)  | 103.87(10) | C(15)-C(16)-H(16B)  | 109.5 |
| C(16)-C(15)-C(10)  | 116.15(11) | H(16A)-C(16)-H(16B) | 109.5 |
| N(14)-C(15)-H(15)  | 108.5      | C(15)-C(16)-H(16C)  | 109.5 |
| C(16)-C(15)-H(15)  | 108.5      | H(16A)-C(16)-H(16C) | 109.5 |
| C(10)-C(15)-H(15)  | 108.5      | H(16B)-C(16)-H(16C) | 109.5 |
| C(15)-C(16)-H(16A) | 109.5      |                     |       |

---

Table 5. Anisotropic displacement parameters ( $\text{\AA}^2 \times 10^3$ ) for TCD53b. The anisotropic displacement factor exponent takes the form:  $-2\pi^2 [ h^2 a^{*2} U^{11} + \dots + 2 h k a^* b^* U^{12} ]$

|       | U <sup>11</sup> | U <sup>22</sup> | U <sup>33</sup> | U <sup>23</sup> | U <sup>13</sup> | U <sup>12</sup> |
|-------|-----------------|-----------------|-----------------|-----------------|-----------------|-----------------|
| C(1)  | 26(1)           | 26(1)           | 27(1)           | 2(1)            | -9(1)           | -8(1)           |
| O(2)  | 35(1)           | 33(1)           | 28(1)           | 7(1)            | -16(1)          | -16(1)          |
| C(3)  | 20(1)           | 24(1)           | 21(1)           | -3(1)           | -6(1)           | -3(1)           |
| C(4)  | 18(1)           | 29(1)           | 26(1)           | -4(1)           | -6(1)           | -7(1)           |
| C(5)  | 20(1)           | 27(1)           | 25(1)           | -1(1)           | -4(1)           | -8(1)           |
| C(6)  | 16(1)           | 24(1)           | 21(1)           | -4(1)           | -3(1)           | -3(1)           |
| C(7)  | 19(1)           | 30(1)           | 25(1)           | -4(1)           | -6(1)           | -8(1)           |
| C(8)  | 23(1)           | 25(1)           | 24(1)           | -2(1)           | -5(1)           | -9(1)           |
| O(9)  | 48(1)           | 42(1)           | 34(1)           | 14(1)           | -22(1)          | -30(1)          |
| C(10) | 19(1)           | 29(1)           | 23(1)           | -3(1)           | -5(1)           | -7(1)           |
| O(11) | 21(1)           | 29(1)           | 26(1)           | -8(1)           | -11(1)          | 3(1)            |
| C(12) | 18(1)           | 28(1)           | 19(1)           | -1(1)           | -6(1)           | -2(1)           |
| N(13) | 24(1)           | 30(1)           | 30(1)           | -10(1)          | -12(1)          | 3(1)            |
| N(14) | 23(1)           | 27(1)           | 25(1)           | -6(1)           | -10(1)          | 0(1)            |
| C(15) | 22(1)           | 26(1)           | 24(1)           | 0(1)            | -9(1)           | -6(1)           |
| C(16) | 24(1)           | 28(1)           | 26(1)           | -6(1)           | -7(1)           | -4(1)           |

Table 6. Hydrogen coordinates ( $\times 10^4$ ) and isotropic displacement parameters ( $\text{\AA}^2 \times 10^{-3}$ ) for TCD53b.

|        | x        | y        | z        | U(eq) |
|--------|----------|----------|----------|-------|
| H(1A)  | 4168     | 8348     | -607     | 31    |
| H(1B)  | 2263     | 10038    | 56       | 31    |
| H(4)   | 19       | 3741     | 1171     | 28    |
| H(5)   | 1302     | 1726     | 2624     | 28    |
| H(7)   | 5868     | 5256     | 2451     | 29    |
| H(10)  | 3080     | 1532     | 4010     | 28    |
| H(13A) | 7210(30) | 4140(30) | 5218(13) | 36(5) |
| H(13B) | 9300(30) | 2080(30) | 5262(14) | 40(5) |
| H(15)  | 5917     | -1484    | 3817     | 28    |
| H(16A) | 8200     | 684      | 2165     | 39    |
| H(16B) | 6666     | -894     | 2117     | 39    |
| H(16C) | 9061     | -1886    | 2523     | 39    |

Table 7. Torsion angles [°] for TCD53b.

---

|                         |             |
|-------------------------|-------------|
| O(9)-C(1)-O(2)-C(3)     | 0.09(15)    |
| C(1)-O(2)-C(3)-C(4)     | 178.87(14)  |
| C(1)-O(2)-C(3)-C(8)     | 0.20(15)    |
| O(2)-C(3)-C(4)-C(5)     | -177.88(13) |
| C(8)-C(3)-C(4)-C(5)     | 0.7(2)      |
| C(3)-C(4)-C(5)-C(6)     | -0.7(2)     |
| C(4)-C(5)-C(6)-C(7)     | 0.3(2)      |
| C(4)-C(5)-C(6)-C(10)    | -179.93(12) |
| C(5)-C(6)-C(7)-C(8)     | 0.3(2)      |
| C(10)-C(6)-C(7)-C(8)    | -179.55(12) |
| C(6)-C(7)-C(8)-O(9)     | 178.54(13)  |
| C(6)-C(7)-C(8)-C(3)     | -0.3(2)     |
| C(4)-C(3)-C(8)-O(9)     | -179.19(12) |
| O(2)-C(3)-C(8)-O(9)     | -0.42(16)   |
| C(4)-C(3)-C(8)-C(7)     | -0.2(2)     |
| O(2)-C(3)-C(8)-C(7)     | 178.61(12)  |
| C(7)-C(8)-O(9)-C(1)     | -178.51(14) |
| C(3)-C(8)-O(9)-C(1)     | 0.46(16)    |
| O(2)-C(1)-O(9)-C(8)     | -0.33(15)   |
| C(5)-C(6)-C(10)-O(11)   | -150.27(12) |
| C(7)-C(6)-C(10)-O(11)   | 29.54(16)   |
| C(5)-C(6)-C(10)-C(15)   | 91.90(15)   |
| C(7)-C(6)-C(10)-C(15)   | -88.30(16)  |
| C(6)-C(10)-O(11)-C(12)  | -133.65(11) |
| C(15)-C(10)-O(11)-C(12) | -6.64(13)   |
| C(10)-O(11)-C(12)-N(14) | 4.06(16)    |
| C(10)-O(11)-C(12)-N(13) | -177.29(11) |
| N(13)-C(12)-N(14)-C(15) | -177.56(14) |
| O(11)-C(12)-N(14)-C(15) | 0.87(17)    |
| C(12)-N(14)-C(15)-C(16) | 120.56(13)  |
| C(12)-N(14)-C(15)-C(10) | -5.01(14)   |
| O(11)-C(10)-C(15)-N(14) | 7.01(13)    |
| C(6)-C(10)-C(15)-N(14)  | 127.83(12)  |
| O(11)-C(10)-C(15)-C(16) | -115.27(12) |
| C(6)-C(10)-C(15)-C(16)  | 5.55(17)    |

Table 8. Hydrogen bonds for TCD53b [ $\text{\AA}$  and  $^\circ$ ].

| D-H...A                | d(D-H)  | d(H...A) | d(D...A)   | $\angle(\text{DHA})$ |
|------------------------|---------|----------|------------|----------------------|
| N(13)-H(13A)...O(11)#1 | 0.91(2) | 2.09(2)  | 2.9969(16) | 173.9(16)            |
| N(13)-H(13B)...N(14)#2 | 0.89(2) | 2.03(2)  | 2.9196(16) | 174.1(17)            |

Symmetry transformations used to generate equivalent atoms:

#1  $-x+1, -y+1, -z+1$  #2  $-x+2, -y, -z+1$

End of supplementary data
